# Supplementary material
Source: PubMed Central journal article supplement (PMC4276534)
Supplement: NIHMS637838-supplement-Supporting_Information.pdf [file NIHMS637838-supplement-Supporting_Information.pdf]

## **Table of Contents:**

|                                             |           |
|---------------------------------------------|-----------|
| General Experimental                        | S1        |
| Compound Experimentals and Characterization | S2 – S7   |
| In Vitro Pharmacology Methods               | S8        |
| DMPK Methods                                | S9 – S10  |
| Selectivity Panel                           | S11 – S13 |
| BAM Dose Response Curve                     | S14       |
| PAMP Dose Response Curve                    | S15       |

### ***General Experimental***

All reagents and solvents were commercial grade and purified prior to use when necessary. Analytical thin layer chromatography (TLC) was performed on Sorbent Technologies HL 0.25 mm silica gel plates with UV indicator. Visualization was accomplished by irradiation under a 254 nm UV lamp and/or the use of an iodine chamber. Chromatography on silica gel was performed using Silica Gel 60 (230-400 mesh) from Sorbent Technologies. <sup>1</sup>H and <sup>13</sup>C NMR spectra were recorded on a Bruker DRX-400 (400 and 100 MHz, respectively) NMR instrument. Chemical shifts are reported in ppm from the solvent resonance as an internal standard. Data are reported as follows: chemical shift, multiplicity (s = singlet, d = doublet, t = triplet, m = multiplet, bs = broad singlet), coupling constant (Hz), and number of protons. Low resolution mass spectra were obtained on an Agilent 6130 Quadrupole LC/MS with electrospray ionization (RT = retention time). Optical rotations were measured on a JASCO P-2000 digital polarimeter at room temperature. Concentration (c) in g/100 mL and solvent are given in parentheses. Preparative purification was performed on a Gilson chromatograph using a Luna 5u C18(2) 100A AXIA column (30x50 mm) using a water/acetonitrile gradient. Chiral separations were performed on a Thar Investigator II supercritical fluid chromatograph (SFC) using Lux Cellulose 4 (10x250 mm), Chiralpak IA (10x250 mm), and Chiralpak ID (10x250 mm) columns.

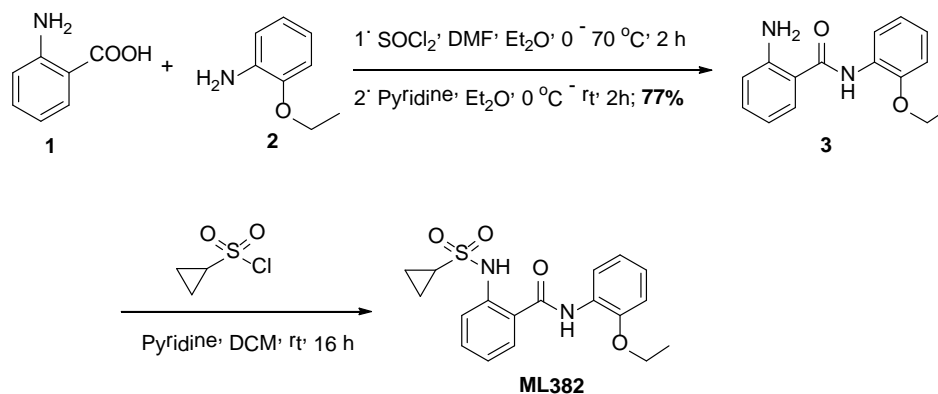

### General Procedure:

**2-amino-N-(2-ethoxyphenyl)benzamide (3).** To a dry argon-filled flask was added anthranic acid, **1**, (1 eq), and 3 drops of dimethylformamide (DMF) and ether as solvent. To the solution, thionyl chloride (2 eq) was added dropwise at 0 °C. The mixture was refluxed for 2 hours. On completion, ether and remaining thionyl chloride were removed under reduced pressure. The mixture was cooled to 0 °C, followed by addition of 0.5 ml pyridine, 2,4-dimethoxyaniline, **2**, (1.2 eq) and ether as solvent. The solution was allowed to warm up to room temperature and stir for 2 h. After removing solvents under reduced pressure, the crude product was purified via reverse phase preparative chromatography (Gilson, Acetonitrile-0.5% NH<sub>4</sub>OH in water), which yielded 2-amino-N-(2-ethoxyphenyl)benzamide, **3**, as yellow solid, 77% yield. <sup>1</sup>H NMR (400.1 MHz, CDCl<sub>3</sub>): δ 8.48-8.46 (m, 1H), 7.52-7.50 (m, 1H), 7.30-7.26 (m, 1H), 7.10-7.00 (m, 2H), 6.94-6.92 (m, 1H), 6.75 (t, 2H, J = 6.87 Hz), 5.62 (s, 2H), 4.18-4.13 (m, 2H), 1.50 (t, 3H, J = 6.94 Hz) <sup>13</sup>C NMR (100.6 MHz, CDCl<sub>3</sub>): δ 167.3, 149.3, 147.7, 132.6, 128.0, 127.2, 123.7, 121.0, 119.9, 117.6, 116.9, 116.7, 111.0, 64.3, 15.0. LCMS: R<sub>T</sub> = 1.01 min, >98% @ 215 and 254 nm, m/z = 257.0 [M + H]<sup>+</sup>.

**2-(cyclopropanesulfonamido)-N-(2-ethoxyphenyl)benzamide, 4l (ML382).** To dry vial was added 2-amino-N-(2-ethoxyphenyl)benzamide, **3**, (1 eq), cyclopropanesulfonyl chloride (2 eq), pyridine (4 eq) and DCM as solvent. The mixture was stirred for 16 h at room temperature. On completion, the crude product was purified by reverse phase preparative chromatography (Gilson, Acetonitrile-0.5% NH<sub>4</sub>OH in water). LCMS: RT = 1.13 min, >95% @ 215 and 254 nm, m/z = 360.9 [M]<sup>+</sup>. <sup>1</sup>H NMR (400.1 MHz, CDCl<sub>3</sub>): δ 10.45 (s, 1H), 8.67 (s, 1H), 8.45-8.43 (m, 1H), 7.85 (d, J = 8.38 Hz, 1H), 7.64 (d, J = 8.02 Hz, 1H), 7.56-7.52 (m, 1H), 7.28-7.22 (m, 1H), 7.15-7.11 (m, 1H), 7.06-7.02 (m, 1H), 6.96-6.94 (m, 1H), 4.22-4.16 (m, 2H), 2.56-2.50 (m, 1H), 1.51 (t, J = 6.97 Hz, 3H), 1.27-1.25 (m, 2H), 0.95-0.92 (m, 2H).

All analogs were made following the General Procedure above:

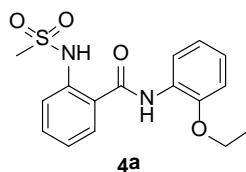

**N-(2-ethoxyphenyl)-2-(methylsulfonamido)benzamide (4a)**

$^1\text{H}$  NMR (400.1 MHz,  $\text{CDCl}_3$ )  $\delta$  (ppm): 1.49 (t,  $J = 7.0$  Hz, 3H), 3.05 (s, 3H), 4.14-4.19 (q,  $J = 7.0$  Hz, 2H), 6.92-6.94(m, 1H), 6.99-7.03(m, 1H), 7.09-7.13 (m, 1H), 7.19-7.23 (m, 1H), 7.52-7.56 (m, 1H), 7.64-7.66(m, 1H), 7.78-7.80 (m, 1H), 8.38-8.41 (m, 1H), 8.67 (s, 1H), 10.58 (s, 1H).  $^{13}\text{C}$  NMR (100.6 MHz,  $\text{CDCl}_3$ ): 14.9, 39.9, 64.4, 111.1, 120.1, 120.2, 121.0, 121.1, 123.6, 124.9, 126.9, 127.0, 133.3, 139.7, 147.8. LC/MS:  $R_T = 1.068$  min,  $m/z = 334.9$   $[\text{M}]^+$ .

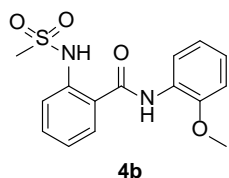

**N-(2-Methoxyphenyl)-2-(methylsulfonamido)benzamide (4b).** Purchased compound.

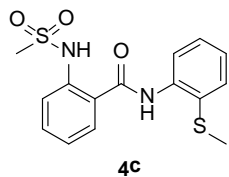

$^1\text{H}$  NMR (400.1 MHz,  $\text{CDCl}_3$ )  $\delta$  (ppm): 2.43 (s, 3H), 3.06 (s, 3H), 7.14-7.18 (m, 1H), 7.21-7.25 (m, 1H), 7.34-7.38 (m, 1H), 7.53-7.58 (m, 1H), 7.74-7.81 (m, 1H), 8.34 (d,  $J = 8.2$  Hz, 1H), 9.22 (s, 1H), 10.63 (s, 1H).  $^{13}\text{C}$  NMR (100.6 MHz  $\text{CDCl}_3$ )  $\delta$  (ppm): 166.58, 140.06, 137.46, 133.71, 132.97, 129.07, 127.21, 126.77, 125.57, 123.65, 121.18, 120.54, 120.07, 40.12, 19.19. LC/MS:  $R_T = 1.008$  min,  $m/z = 336.9$   $[\text{M}]^+$ .

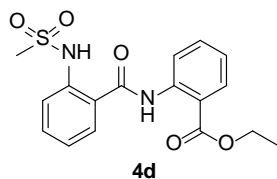

**Ethyl 2-(2-(methylsulfonamido)benzamido)benzoate (4d).** Purchased compound.

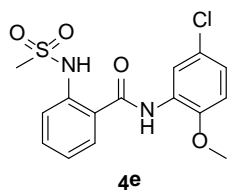

**N-(5-Chloro-2-methoxyphenyl)-2-(methylsulfonamido)benzamide (4e).** Purchased compound.

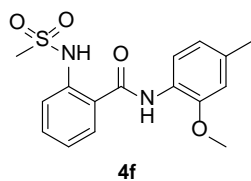

**N-(2-Methoxy-4-methylphenyl)-2-(methylsulfonamido)benzamide (4f).** Purchased compound.

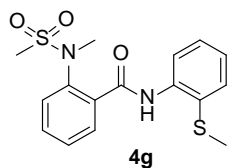

**2-(N-methylmethylsulfonamido)-N-(2-(methylthio)phenyl)benzamide (4g).**

$^1\text{H}$  NMR (400.1 MHz,  $\text{CDCl}_3$ )  $\delta$  (ppm): 2.40 (s, 3H), 2.98 (s, 3H), 3.39 (s, 3H), 7.11-7.15 (m, 3H), 7.33 (t,  $J = 7.6$  Hz, 1H), 7.45-7.50 (m, 3H), 7.52-7.57 (m, 3H), 7.80 (d,  $J = 7.2$  Hz, 1H), 8.38 (d,  $J = 8.1$  Hz, 1H), 9.13 (s, 1H).  $^{13}\text{C}$  NMR (100.6 MHz,  $\text{CDCl}_3$ )  $\delta$  (ppm): 165.61, 138.87, 138.08, 136.47, 132.65, 131.81, 129.68, 128.97, 128.72, 128.63, 126.85, 125.20, 121.48, 39.27, 37.33, 19.05. LC/MS:  $R_T = 0.970$  min,  $m/z = 350.8$   $[\text{M}]^+$ .

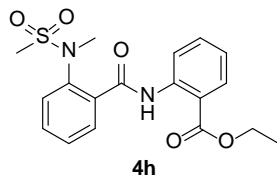

**Ethyl 2-(2-(N-methylmethylsulfonamido)benzamido)benzoate (4h).** Purchased compound.

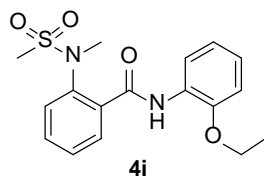

**N-(2-ethoxyphenyl)-2-(N-methylmethylsulfonamido)benzamide (4i).**

$^1\text{H}$  NMR (400.1 MHz,  $\text{CDCl}_3$ )  $\delta$  (ppm): 1.42 (t,  $J = 7.0$  Hz, 3H), 2.99 (s, 3H), 3.33 (s, 3H), 4.11-4.16 (q,  $J = 7.0$  Hz, 2H), 6.89-6.91 (m, 1H), 6.96-7.00 (m, 1H), 7.05-7.09 (m, 1H), 7.44-7.48 (m, 2H), 7.51-7.55 (m, 1H), 7.79-7.81 (m, 1H), 8.49-8.52 (dd,  $J = 1.3, 8.0$  Hz, 1H), 8.93 (s, 1H).  $^{13}\text{C}$  NMR (100.6 MHz,  $\text{CDCl}_3$ )  $\delta$  (ppm): 165.28, 147.78, 138.64, 136.38, 131.70, 129.89, 129.01, 128.88, 127.69, 124.50, 120.94, 120.43, 111.18, 64.31, 39.19, 37.80, 14.82. LC/MS:  $R_T = 1.002$  min,  $m/z = 348.9$   $[\text{M}]^+$ .

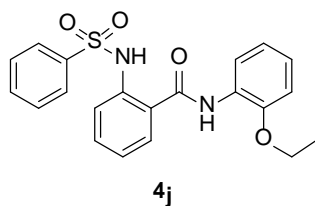

**N-(2-Ethoxyphenyl)-2-(phenylsulfonamido)benzamide (4j).** Purchased compound.

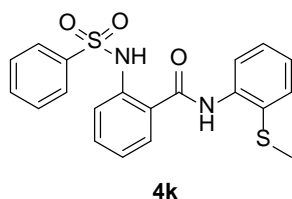

**N-(2-(methylthio)phenyl)-2-(phenylsulfonamido)benzamide (4k).** Purchased compound.

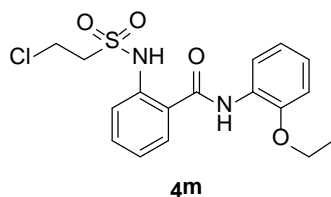

**2-(2-chloroethylsulfonamido)-N-(2-ethoxyphenyl)benzamide (4m).**

$^1\text{H}$  NMR (400.1 MHz,  $\text{CDCl}_3$ )  $\delta$  (ppm): 1.49 (t,  $J = 7.0$  Hz, 3H), 3.53-3.57 (m, 2H), 3.83-3.87 (m, 2H), 4.14-4.20 (q,  $J = 7.0$  Hz, 2H), 6.92-6.94 (dd,  $J = 1.1, 8.1$  Hz, 1H), 7.00-7.04 (m, 1H), 7.10-7.14 (m, 1H), 7.21-7.23 (m, 1H), 7.53-7.57 (m, 1H), 7.65-7.67 (dd,  $J = 1.3, 8.0$  Hz, 1H), 7.79-7.81 (dd,  $J = 0.7, 8.3$  Hz, 1H), 8.37-8.39 (dd,  $J = 1.5, 8.0$  Hz, 1H), 8.68 (s, 1H), 10.80 (s, 1H).  $^{13}\text{C}$  NMR (100.6 MHz,  $\text{CDCl}_3$ ): 15.0, 36.2, 53.9, 64.5, 111.1, 120.4, 120.7, 121.2, 122.1, 124.2, 124.6, 124.9, 126.8, 133.1, 138.6, 147.8, 166.1. LC/MS:  $R_T = 1.232$  min,  $m/z = 382.8$   $[\text{M}]^+$ .

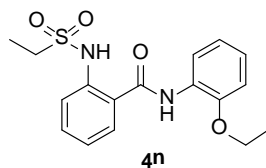

**N-(2-ethoxyphenyl)-2-(ethylsulfonamido)benzamide (4n).**

$^1\text{H}$  NMR (400.1 MHz,  $\text{CDCl}_3$ )  $\delta$  (ppm): 1.36 (t,  $J = 7.5$  Hz, 3H), 1.47-1.51 (t,  $J = 6.9$  Hz, 3H), 3.14-3.19 (q,  $J = 7.5$  Hz, 2H), 4.14-4.19 (q,  $J = 6.9$  Hz, 2H), 6.91-6.94 (m, 1H), 6.99-7.03 (m, 1H), 7.08-7.13 (m, 1H), 7.16-7.20 (m, 1H), 7.49-7.53 (m, 1H), 7.62-7.64 (dd,  $J = 1.1$  Hz, 7.9, 1H), 7.81 (d,  $J = 8.3$  Hz, 1H), 8.39-8.41 (dd,  $J = 1.4, 7.9$  Hz, 1H), 8.66 (s, 1H), 10.60 (s, 1H).  $^{13}\text{C}$  NMR (100.6 MHz,  $\text{CDCl}_3$ ): 8.2,

14.9, 46.5, 64.4, 111.1, 119.7, 120.2, 120.8, 121.0, 123.3, 124.8, 126.9, 127.0, 133.3, 139.9, 147.8, 166.2.  
LC/MS:  $R_T = 1.129$  min,  $m/z = 348.9$   $[M]^+$ .

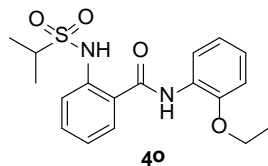

***N*-(2-Ethoxyphenyl)-2-(1-methylethylsulfonamido)benzamide (4o).**

LC/MS: >98% @ 215 and 254 nm,  $m/z = 362.9$   $[M]^+$ .

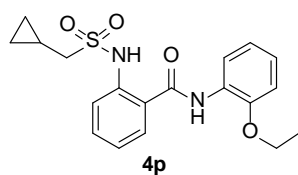

**2-(Cyclopropylmethylsulfonamido)-*N*-(2-ethoxyphenyl)benzamide (4p).**

LC/MS: >98% @ 215 and 254 nm,  $m/z = 374.9$   $[M]^+$ .

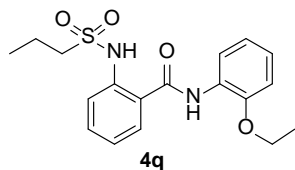

***N*-(2-Ethoxyphenyl)-2-(propylsulfonamido)benzamide (4q).**

LC/MS: >98% @ 215 and 254 nm,  $m/z = 362.9$   $[M]^+$ .

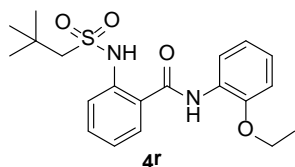

**2-(2,2-Dimethylpropylsulfonamido)-*N*-(2-ethoxyphenyl)benzamide (4r).**

LC/MS: >98% @ 215 and 254 nm,  $m/z = 390.9$   $[M]^+$ .

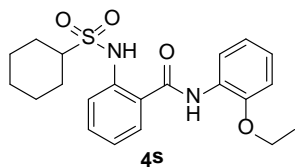

**2-(Cyclohexanesulfonamido)-N-(2-ethoxyphenyl)benzamide (4s).**

LC/MS: >98% @ 215 and 254 nm,  $m/z = 402.9$   $[M]^+$ .

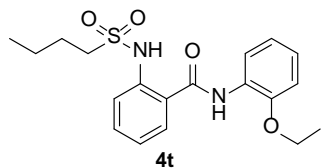

**2-(Butylsulfonamido)-N-(2-ethoxyphenyl)benzamide (4t).**

LC/MS: >98% @ 215 and 254 nm,  $m/z = 376.9$   $[M]^+$ .

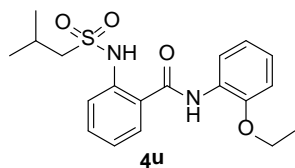

**N-(2-Ethoxyphenyl)-2-(2-methylpropylsulfonamido)benzamide (4u).**

LC/MS: >98% @ 215 and 254 nm,  $m/z = 376.9$   $[M]^+$ .

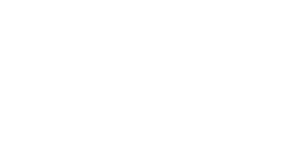

### *In Vitro Pharmacology Methods*

**Cell based Ca<sup>2+</sup> imaging assay to detect MrgX1 activation.** The purpose of this assay is to identify test compounds that act as an allosteric agonist for MrgX1. This assay employs a HEK293 cell line that stably expresses MrgX1 protein. The cells, which loaded with fluorescent dye-Fluo4, are treated with test compounds, followed by measurement of calcium flux. Those HEK293 cells stably expressing MrgX1 were plated into 96-well plates. On the following day, cells were incubated with Fluo4 solution at 37 °C for 30min and at RT for 30 min after removing media. 10 µM compounds were added to the assay buffer with dye for 80 sec followed by adding 10 nM BAM8-22 for 75 sec and recorded the change of fluorescence by Flexstation3 imaging plate reader. Compound effect was evaluated by the calculated fluorescence ratio. If the compound causes more than 3 times the standard deviation of the B-scores of the library compounds, the compound is then considered to be active as an agonist of the MrgX1 protein.



### ***In Vitro* DMPK Methods:**

The metabolism of ML382 was investigated in human, rat and mouse hepatic microsomes (BD Biosciences, Billerica, MA) using substrate depletion methodology (% test article remaining). A potassium phosphate-buffered reaction mixture (0.1 M, pH 7.4) of test article (1  $\mu$ M) and microsomes (0.5 mg/mL) was pre-incubated (5 min) at 37°C prior to the addition of NADPH (1 mM). The incubations, performed in 96-well plates, were continued at 37 °C under ambient oxygenation and aliquots (80  $\mu$ L) were removed at selected time intervals (0, 3, 7, 15, 25 and 45 min). Protein was precipitated by the addition of chilled acetonitrile (160  $\mu$ L), containing glyburide as an internal standard (50 ng/mL), and centrifuged at 3000 rpm (4°C) for 10 min. Resulting supernatants were transferred to new 96-well plates in preparation for LC/MS/MS analysis. The *in vitro* half-life ( $t_{1/2}$ , min, Eq. 1), intrinsic clearance ( $CL_{int}$ , mL/min/kg, Eq. 2) and subsequent predicted hepatic clearance ( $CL_{hep}$ , mL/min/kg, Eq. 3) were determined employing the following equations:

$$(1) t_{1/2} = \text{Ln}(2) / k ; \text{ where } k \text{ represents the slope from linear regression analysis (\% test article remaining)}$$

$$(2) CL_{int} = (0.693 / t_{1/2}) (\text{rxn volume} / \text{mg of microsomes}) (45 \text{ mg microsomes} / \text{gram of liver}) (20^a \text{ gm of liver} / \text{kg body weight}); \text{ } ^a \text{scale-up factors of 20 (human) and 45 (rat)}$$

$$(3) CL_{hep} = \frac{Q \cdot CL_{int}}{Q + CL_{int}}$$

**Plasma Protein Binding.** Protein binding of ML382 was determined in human, rat and mouse plasma via equilibrium dialysis employing Single-Use RED Plates with inserts (ThermoFisher Scientific, Rochester, NY). Briefly plasma (220  $\mu$ L) was added to the 96 well plate containing test article (5  $\mu$ L) and mixed thoroughly. Subsequently, 200  $\mu$ L of the plasma-test article mixture was transferred to the *cis* chamber (red) of the RED plate, with an accompanying 350  $\mu$ L of phosphate buffer (25 mM, pH 7.4) in the *trans* chamber. The RED plate was sealed and incubated 4 h at 37 °C with shaking. At completion, 50  $\mu$ L aliquots from each chamber were diluted 1:1 (50  $\mu$ L) with either plasma (*cis*) or buffer (*trans*) and transferred to a new 96 well plate, at which time ice-cold acetonitrile (2 volumes) was added to extract the matrices. The plate was centrifuged (3000 rpm, 10 min) and supernatants transferred to a new 96 well plate. The sealed plate was stored at -20 °C until LC/MS/MS analysis.

**Liquid Chromatography/Mass Spectrometry Analysis.** *In vitro experiments.* ML382 was analyzed via electrospray ionization (ESI) on an AB Sciex API-4000 (Foster City, CA) triple-quadrupole instrument that was coupled with Shimadzu LC-10AD pumps (Columbia, MD) and a Leap Technologies CTC PAL auto-sampler (Carrboro, NC). Analytes were separated by gradient elution using a Fortis C18 2.1 x 50 mm, 3.5  $\mu$ m column (Fortis Technologies Ltd, Cheshire, UK) thermostated at 40 °C. HPLC mobile phase A was 0.1% NH<sub>4</sub>OH (pH unadjusted), mobile phase B was acetonitrile. The gradient started at 30% B after a 0.2 min hold and was linearly increased to 90% B over 0.8 min; held at 90% B for 0.5 min and returned to 30% B in 0.1 min followed by a re-equilibration (0.9 min). The total run time was 2.5 min and the HPLC flow rate was 0.5 mL/min. The source temperature was set at 500°C and mass spectral analyses were performed using multiple reaction monitoring (MRM) utilizing a Turbo-Ionspray® source in positive ionization mode (5.0 kV spray voltage). LC/MS/MS analysis was performed employing a

TSQ Quantum<sup>ULTRA</sup> that was coupled to a ThermoSurveyor LC system (Thermoelectron Corp., San Jose, CA) and a Leap Technologies CTC PAL auto-sampler (Carrboro, NC). Chromatographic separation of analytes was achieved with an Acquity BEH C18 2.1 x 50 mm, 1.7  $\mu$ m column (Waters, Taunton, MA).

## Summary of Significant Results

Biochemical assay results are presented as the percent inhibition of specific binding or activity throughout the report. All other results are expressed in terms of that assay's quantitation method.

- For primary assays, only the lowest concentration with a significant response judged by the assays' criteria, is shown in this summary.
- Where applicable, either the secondary assay results with the lowest dose/concentration meeting the significance criteria or, if inactive, the highest dose/concentration that did not meet the significance criteria is shown.
- Unless otherwise requested, primary screening in duplicate with quantitative data (e.g.,  $IC_{50} \pm SEM$ ,  $K_i \pm SEM$  and  $n_H$ ) are shown where applicable for individual requested assays. In screening packages, primary screening in duplicate with semi-quantitative data (e.g., estimated  $IC_{50}$ ,  $K_i$  and  $n_H$ ) are shown where applicable (concentration range of 4 log units); available secondary functional assays are carried out (30 mM) and MEC or MIC determined only if active in primary assays >50% at 1 log unit below initial test concentration.

Significant responses ( $\geq 50\%$  inhibition or stimulation for Biochemical assays) were noted in the primary assays listed below:

| Cat #  | Assay Name                                         | Species | Conc.      | % Inh. | $IC_{50}^*$ | $K_i$ | $n_H$ |
|--------|----------------------------------------------------|---------|------------|--------|-------------|-------|-------|
| 271700 | Serotonin (5-Hydroxytryptamine) 5-HT <sub>2A</sub> | hum     | 10 $\mu$ M | 63     |             |       |       |

\* A standard error of the mean is presented where results are based on multiple, independent determinations.  
ham=Hamster; hum=Human

## Experimental Results

| Cat #                                 | Assay Name                                 | Batch* | Spec. | Rep. | Conc. | % Inh. | IC <sub>50</sub> * | K <sub>i</sub> | n <sub>H</sub> | R |
|---------------------------------------|--------------------------------------------|--------|-------|------|-------|--------|--------------------|----------------|----------------|---|
| <b>Compound: ML382, PT #: 1176873</b> |                                            |        |       |      |       |        |                    |                |                |   |
| 200510                                | Adenosine A <sub>1</sub>                   | 344150 | hum   | 2    | 10 µM | -1     |                    |                |                |   |
| 200610                                | Adenosine A <sub>2A</sub>                  | 344151 | hum   | 2    | 10 µM | -26    |                    |                |                | 1 |
| 200720                                | Adenosine A <sub>3</sub>                   | 344148 | hum   | 2    | 10 µM | 10     |                    |                |                |   |
| 203100                                | Adrenergic α <sub>1A</sub>                 | 344152 | rat   | 2    | 10 µM | 1      |                    |                |                |   |
| 203200                                | Adrenergic α <sub>1B</sub>                 | 344240 | rat   | 2    | 10 µM | 2      |                    |                |                |   |
| 203400                                | Adrenergic α <sub>1D</sub>                 | 344154 | hum   | 2    | 10 µM | 6      |                    |                |                |   |
| 203630                                | Adrenergic α <sub>2A</sub>                 | 344155 | hum   | 2    | 10 µM | -13    |                    |                |                |   |
| 204010                                | Adrenergic β <sub>1</sub>                  | 344146 | hum   | 2    | 10 µM | -3     |                    |                |                |   |
| 204110                                | Adrenergic β <sub>2</sub>                  | 344156 | hum   | 2    | 10 µM | -11    |                    |                |                |   |
| 206000                                | Androgen (Testosterone)                    | 344120 | hum   | 2    | 10 µM | 4      |                    |                |                |   |
| 212510                                | Bradykinin B <sub>1</sub>                  | 344119 | hum   | 2    | 10 µM | 28     |                    |                |                |   |
| 212620                                | Bradykinin B <sub>2</sub>                  | 344191 | hum   | 2    | 10 µM | 14     |                    |                |                |   |
| 214510                                | Calcium Channel L-Type, Benzothiazepine    | 344415 | rat   | 2    | 10 µM | -1     |                    |                |                |   |
| 214600                                | Calcium Channel L-Type, Dihydropyridine    | 344157 | rat   | 2    | 10 µM | -6     |                    |                |                |   |
| 216000                                | Calcium Channel N-Type                     | 344192 | rat   | 2    | 10 µM | -12    |                    |                |                |   |
| 217030                                | Cannabinoid CB <sub>1</sub>                | 344158 | hum   | 2    | 10 µM | -8     |                    |                |                |   |
| 219500                                | Dopamine D <sub>1</sub>                    | 344159 | hum   | 2    | 10 µM | 12     |                    |                |                |   |
| 219700                                | Dopamine D <sub>2S</sub>                   | 344160 | hum   | 2    | 10 µM | -10    |                    |                |                |   |
| 219800                                | Dopamine D <sub>3</sub>                    | 344161 | hum   | 2    | 10 µM | -18    |                    |                |                |   |
| 219900                                | Dopamine D <sub>4.2</sub>                  | 344162 | hum   | 2    | 10 µM | -10    |                    |                |                |   |
| 224010                                | Endothelin ET <sub>A</sub>                 | 344193 | hum   | 2    | 10 µM | 7      |                    |                |                |   |
| 224110                                | Endothelin ET <sub>B</sub>                 | 344122 | hum   | 2    | 10 µM | -12    |                    |                |                |   |
| 225510                                | Epidermal Growth Factor (EGF)              | 344089 | hum   | 2    | 10 µM | 9      |                    |                |                |   |
| 226010                                | Estrogen ERα                               | 344194 | hum   | 2    | 10 µM | -3     |                    |                |                |   |
| 226600                                | GABA <sub>A</sub> , Flunitrazepam, Central | 344164 | rat   | 2    | 10 µM | 11     |                    |                |                |   |
| 226500                                | GABA <sub>A</sub> , Muscimol, Central      | 344163 | rat   | 2    | 10 µM | 0      |                    |                |                |   |
| 228610                                | GABA <sub>B1A</sub>                        | 344149 | hum   | 2    | 10 µM | 14     |                    |                |                |   |
| 232030                                | Glucocorticoid                             | 344197 | hum   | 2    | 10 µM | 2      |                    |                |                |   |
| 232700                                | Glutamate, Kainate                         | 344198 | rat   | 2    | 10 µM | -1     |                    |                |                |   |
| 232810                                | Glutamate, NMDA, Agonism                   | 344199 | rat   | 2    | 10 µM | 0      |                    |                |                |   |
| 232910                                | Glutamate, NMDA, Glycine                   | 344200 | rat   | 2    | 10 µM | 4      |                    |                |                |   |
| 233000                                | Glutamate, NMDA, Phencyclidine             | 344165 | rat   | 2    | 10 µM | 5      |                    |                |                |   |
| 239610                                | Histamine H <sub>1</sub>                   | 344166 | hum   | 2    | 10 µM | -12    |                    |                |                |   |
| 239710                                | Histamine H <sub>2</sub>                   | 344145 | hum   | 2    | 10 µM | 0      |                    |                |                |   |

Note: Items meeting criteria for significance (≥50% stimulation or inhibition) are highlighted.

\* Batch: Represents compounds tested concurrently in the same assay(s).

ham=Hamster; hum=Human

R=See Remarks (if any) at end of this section.

Vanderbilt University

Study #: AB22401, Quote #: 37272-1, Compound Code: ML382 (1176873)

Friday, November 22, 2013

Page 6 of 35

## Experimental Results

| Cat #  | Assay Name                                          | Batch* | Spec.  | Rep. | Conc. | % Inh. | IC <sub>50</sub> * | K <sub>i</sub> | n <sub>H</sub> | R |
|--------|-----------------------------------------------------|--------|--------|------|-------|--------|--------------------|----------------|----------------|---|
| 239820 | Histamine H <sub>3</sub>                            | 344201 | hum    | 2    | 10 µM | 2      |                    |                |                |   |
| 241000 | Imidazoline I <sub>2</sub> , Central                | 344181 | rat    | 2    | 10 µM | -7     |                    |                |                |   |
| 243520 | Interleukin IL-1                                    | 344202 | mouse  | 2    | 10 µM | 5      |                    |                |                |   |
| 250460 | Leukotriene, Cysteinyl CysLT <sub>1</sub>           | 344203 | hum    | 2    | 10 µM | 0      |                    |                |                |   |
| 251600 | Melatonin MT <sub>1</sub>                           | 344138 | hum    | 2    | 10 µM | 7      |                    |                |                |   |
| 252610 | Muscarinic M <sub>1</sub>                           | 344167 | hum    | 2    | 10 µM | 9      |                    |                |                |   |
| 252710 | Muscarinic M <sub>2</sub>                           | 344168 | hum    | 2    | 10 µM | -17    |                    |                |                |   |
| 252810 | Muscarinic M <sub>3</sub>                           | 344169 | hum    | 2    | 10 µM | -4     |                    |                |                |   |
| 257010 | Neuropeptide Y Y <sub>1</sub>                       | 344221 | hum    | 2    | 10 µM | 1      |                    |                |                |   |
| 257110 | Neuropeptide Y Y <sub>2</sub>                       | 344205 | hum    | 2    | 10 µM | 2      |                    |                |                |   |
| 258590 | Nicotinic Acetylcholine                             | 344139 | hum    | 2    | 10 µM | 12     |                    |                |                |   |
| 258700 | Nicotinic Acetylcholine α1, Bungarotoxin            | 344140 | hum    | 2    | 10 µM | 0      |                    |                |                |   |
| 260130 | Opiate δ <sub>1</sub> (OP1, DOP)                    | 344206 | hum    | 2    | 10 µM | 0      |                    |                |                |   |
| 260210 | Opiate κ (OP2, KOP)                                 | 344207 | hum    | 2    | 10 µM | 4      |                    |                |                |   |
| 260410 | Opiate μ (OP3, MOP)                                 | 344171 | hum    | 2    | 10 µM | 2      |                    |                |                |   |
| 264500 | Phorbol Ester                                       | 344172 | mouse  | 2    | 10 µM | 0      |                    |                |                |   |
| 265010 | Platelet Activating Factor (PAF)                    | 344214 | hum    | 2    | 10 µM | 15     |                    |                |                |   |
| 265600 | Potassium Channel [K <sub>ATP</sub> ]               | 344173 | ham    | 2    | 10 µM | 10     |                    |                |                |   |
| 265900 | Potassium Channel hERG                              | 344174 | hum    | 2    | 10 µM | 2      |                    |                |                |   |
| 268420 | Prostanoid EP <sub>4</sub>                          | 344175 | hum    | 2    | 10 µM | 12     |                    |                |                |   |
| 268700 | Purinergic P2X                                      | 344208 | rabbit | 2    | 10 µM | 33     |                    |                |                |   |
| 268810 | Purinergic P2Y                                      | 344209 | rat    | 2    | 10 µM | 20     |                    |                |                |   |
| 270000 | Rolipram                                            | 344176 | rat    | 2    | 10 µM | 11     |                    |                |                |   |
| 271110 | Serotonin (5-Hydroxytryptamine) 5-HT <sub>1A</sub>  | 344211 | hum    | 2    | 10 µM | -2     |                    |                |                |   |
| 271700 | Serotonin (5-Hydroxytryptamine) 5-HT <sub>2B</sub>  | 344177 | hum    | 2    | 10 µM | 63     |                    |                |                |   |
| 271910 | Serotonin (5-Hydroxytryptamine) 5-HT <sub>3</sub>   | 344210 | hum    | 2    | 10 µM | 8      |                    |                |                |   |
| 278110 | Sigma σ <sub>1</sub>                                | 344178 | hum    | 2    | 10 µM | -1     |                    |                |                |   |
| 279510 | Sodium Channel, Site 2                              | 344180 | rat    | 2    | 10 µM | 7      |                    |                |                |   |
| 255520 | Tachykinin NK <sub>1</sub>                          | 344170 | hum    | 2    | 10 µM | 8      |                    |                |                |   |
| 285900 | Thyroid Hormone                                     | 344215 | rat    | 2    | 10 µM | 1      |                    |                |                |   |
| 220320 | Transporter, Dopamine (DAT)                         | 344123 | hum    | 2    | 10 µM | -5     |                    |                |                |   |
| 226400 | Transporter, GABA                                   | 344196 | rat    | 2    | 10 µM | 10     |                    |                |                |   |
| 204410 | Transporter, Norepinephrine (NET)                   | 344141 | hum    | 2    | 10 µM | 0      |                    |                |                |   |
| 274030 | Transporter, Serotonin (5-Hydroxytryptamine) (SERT) | 344179 | hum    | 2    | 10 µM | 5      |                    |                |                |   |

Note: Items meeting criteria for significance (≥50% stimulation or inhibition) are highlighted.

\* Batch: Represents compounds tested concurrently in the same assay(s).

ham=Hamster; hum=Human

R=See Remarks (if any) at end of this section.

Vanderbilt University

Study #: AB22401, Quote #: 37272-1, Compound Code: ML382 (1176873)

Friday, November 22, 2013

Page 7 of 35

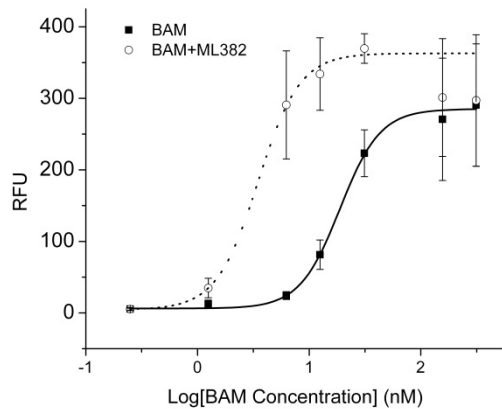

BAM:  
 $EC_{50} = 18.67 \pm 1.06$  nM  
 BAM + 5 $\mu$ M ML382:  
 $EC_{50} = 2.87 \pm 1.22$  nM  
 [95% confidence interval]

**Supplemental Figure 1.** ML382 enhances the potency of BAM8-22 on MrgX1-expressing HEK293 cells. Dose response curve of BAM8-22 in presence (red circles) or absence of ML382 (black squares) determined by  $Ca^{2+}$  imaging assay. The  $EC_{50}$  of BAM8-22 in presence of maximal amount of ML382 (5  $\mu$ M) is  $2.87 \pm 1.22$  nM (95% confidence interval). In the absence of ML382, the  $EC_{50}$  of BAM8-22 is  $18.67 \pm 1.06$  nM (95% confidence interval). RFU: relative fluorescence units. The fitting was dose response fitting. The experiments were repeated three times. Error bars represent as Mean  $\pm$  SEM.

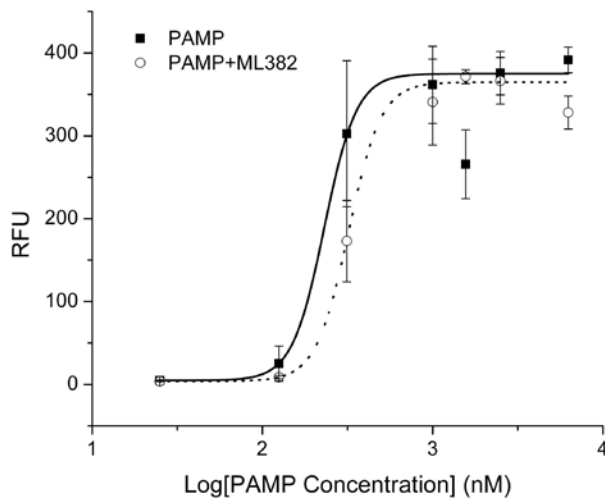

PAMP:  
 $EC_{50} = 211.86 \pm 51.98$  nM  
PAMP + 5  $\mu$ M ML382:  
 $EC_{50} = 316.12 \pm 17.8$  nM  
[95% confidence interval]

**Supplemental Figure 2.** ML382 has no effect on MrgX2-expressing HEK293 cells. Dose response curve of PAMP (an agonist of MrgX2)<sup>[11]</sup> in presence (red circles) or absence of ML382 (black squares) determined by  $Ca^{2+}$  imaging assay. The  $EC_{50}$  of PAMP in presence of 5  $\mu$ M ML382 is  $316.12 \pm 17.8$  nM (95% confidence interval). In the absence of ML382, the  $EC_{50}$  of BAM8-22 is  $211.86 \pm 51.98$  nM (95% confidence interval). RFU: relative fluorescence units. The fitting was dose response fitting. The experiments were repeated three times. Error bars represent as Mean  $\pm$  SEM.
